# Supplementary material for: Individual differences and creative ideation: neuromodulatory signatures of mindset and response inhibition
Source: Frontiers journal article supplement (doi:10.3389/fnins.2023.1238165), 2023-12-06
Supplement: Data_Sheet_1.PDF [file Data_Sheet_1.PDF]

## Carol Dweck's Growth vs. Fixed Mindset Assessment

Place a check in the column that identifies the extent to which you agree or disagree with each statement.

|                                                                                                         | <b>Strongly Agree</b> | <b>Agree</b> | <b>Disagree</b> | <b>Strongly Disagree</b> |
|---------------------------------------------------------------------------------------------------------|-----------------------|--------------|-----------------|--------------------------|
| 1. Your intelligence is something very basic about you that you can't change very much.                 |                       |              |                 |                          |
| 2. No matter how much intelligence you have, you can always change it quite a bit.                      |                       |              |                 |                          |
| 3. You can always substantially change how intelligent you are.                                         |                       |              |                 |                          |
| 4. You are a certain kind of person, and there is not much that can be done to really change that.      |                       |              |                 |                          |
| 5. You can always change basic things about the kind of person you are.                                 |                       |              |                 |                          |
| 6. Music talent can be learned by anyone.                                                               |                       |              |                 |                          |
| 7. Only a few people will be truly good at sports – you have to be “born with it.”                      |                       |              |                 |                          |
| 8. Math is much easier to learn if you are male or maybe come from a culture that values math.          |                       |              |                 |                          |
| 9. The harder you work at something, the better you will be at it.                                      |                       |              |                 |                          |
| 10. No matter what kind of person you are, you can always change substantially.                         |                       |              |                 |                          |
| 11. Trying new things is stressful for me and I avoid it.                                               |                       |              |                 |                          |
| 12. Some people are good and kind, some are not – it is not often that people change.                   |                       |              |                 |                          |
| 13. I appreciate when parents, coaches, teachers give me feedback about my performance.                 |                       |              |                 |                          |
| 14. I often get angry when I get feedback about my performance.                                         |                       |              |                 |                          |
| 15. All human beings without a brain injury or birth defect are capable of the same amount of learning. |                       |              |                 |                          |
| 16. You can learn new things, but you can't really change how intelligent you are.                      |                       |              |                 |                          |
| 17. You can do things differently, but the important part of who you are can't really be changed.       |                       |              |                 |                          |
| 18. Human beings are basically good, but sometimes make terrible decisions.                             |                       |              |                 |                          |
| 19. An important reason why I do my schoolwork is that I like to learn new things.                      |                       |              |                 |                          |
| 20. Truly smart people don't need to try hard.                                                          |                       |              |                 |                          |

Circle the number in the box that matches each answer.

|                                            | Strongly Agree | Agree | Disagree | Strongly Disagree |
|--------------------------------------------|----------------|-------|----------|-------------------|
| 1. Ability mindset – FIXED                 | 0              | 1     | 2        | 3                 |
| 2. Ability mindset – GROWTH                | 3              | 2     | 1        | 0                 |
| 3. Ability mindset – GROWTH                | 3              | 2     | 1        | 0                 |
| 4. Personality/character mindset – FIXED   | 0              | 1     | 2        | 3                 |
| 5. Personality/character mindset – GROWTH  | 3              | 2     | 1        | 0                 |
| 6. Ability mindset – GROWTH                | 3              | 2     | 1        | 0                 |
| 7. Ability mindset – FIXED                 | 0              | 1     | 2        | 3                 |
| 8. Ability mindset – FIXED                 | 0              | 1     | 2        | 3                 |
| 9. Ability mindset – GROWTH                | 3              | 2     | 1        | 0                 |
| 10. Personality/character mindset – GROWTH | 3              | 2     | 1        | 0                 |
| 11. Ability mindset – FIXED                | 0              | 1     | 2        | 3                 |
| 12. Personality/character mindset – FIXED  | 0              | 1     | 2        | 3                 |
| 13. Ability mindset – GROWTH               | 3              | 2     | 1        | 0                 |
| 14. Ability mindset – FIXED                | 0              | 1     | 2        | 3                 |
| 15. Ability mindset – GROWTH               | 3              | 2     | 1        | 0                 |
| 16. Ability mindset – FIXED                | 0              | 1     | 2        | 3                 |
| 17. Personality/character mindset – FIXED  | 0              | 1     | 2        | 3                 |
| 18. Personality/character mindset – GROWTH | 3              | 2     | 1        | 0                 |
| 19. Ability mindset – GROWTH               | 3              | 2     | 1        | 0                 |
| 20. Personality/character mindset – FIXED  | 0              | 1     | 2        | 3                 |
| <b>Total</b>                               |                |       |          |                   |
| <b>Grand Total</b>                         |                |       |          |                   |

Strong Growth Mindset = 45 – 60 pts.

Growth Mindset with some Fixed ideas = 34 – 44 pts.

Fixed Mindset with some Growth ideas = 21 – 33 pts.

Strong Fixed Mindset = 0 – 20 pts.
